# Supplementary material
Source: Research Square preprint supplement (doi:10.21203/rs.3.rs-9177115/v1)
Supplement: Supplementary file 1 [file e00965d516a7f8e075c0b2c1.docx]

*Appendix 1*

**Healthcare Professionals’ Implementation-needs Questionnaire, validated among family doctors (HPIQ-FD)**

**(final version - translated from Ukrainian)**

The survey is being conducted by (specify by whom).

- **Our goal:** (specify goal).
- **Time to complete:** (less than 15 min).
- **Confidentiality guaranteed:** Only (specify who) will know about your answers.

**We are grateful to you:** your participation in this survey can help the healthcare system become better!

For a researcher conducting a needs assessment of healthcare workers during implementation, it is important to include in the preamble of the questionnaire:

- Describe the name and essence of the method or recommendation
- Indicate the scientific justification for the method or recommendation, evidence
- Explain why it would be beneficial for healthcare professionals to implement this
- further in the questionnaire itself, replace the words “[use of method/evidence-based recommendations]” with the name of the actual method or recommendation.

Closed questions are rated on a 5-point Likert scale (1 - "strongly disagree", 2 - "disagree", 3 - "uncertain", 4 - "agree", 5 - "strongly agree").

Answers to open-ended questions are provided in the form of extended text)

| Questionnaire items (Question/Statement) | Response Options |
| --- | --- |
| 1.1. To implement [method/evidence-based recommendations] in my practice, I definitely need clearer **instructions than I currently have** on [using the method/evidence-based recommendations]. | Likert scale |
| 1.2. If you need clearer instructions, please indicate **what exactly in the instructions needs clarification or more detailed explanation?** | Open-ended |
| 2.1. To implement [method/evidence-based recommendations] in my practice, I definitely need ...more than I currently **have the practical skills** needed to [use the method/evidence-based recommendations] | Likert scale |
| 2.2. If you need more practical skills for [using the method/evidence-based recommendations], please specify **which ones?** | Open-ended |
| 2.3. If you need more practical skills for [using the method/evidence-based recommendations], please specify **what you need to develop them?** *(i.e. training with practical work, supervision meetings with experts, mentoring, video, online course, other - specify what)* | Open-ended |
| 3.1. To implement [method/evidence-based recommendations] into my practice, I will definitely need **more time** than I have now to do it. | Likert scale |
| 3.2. If you need more time, please indicate **what could help free up time** for [use of method/evidence-based recommendations]? *(i.e. increasing the duration of the consultation, additional paid hours, time management training, hiring an assistant, other - specify what).* | Open-ended |
| 4.1. To implement [method/evidence-based recommendations] in my practice, I definitely need additional **financial motivation** . | Likert scale |
| 4.2. If you need additional financial motivation**, what amount** would you consider sufficient [for amount of work completed]* *[for the amount of work completed] is established by the person conducting the survey of healthcare professionals and is indicated in the questionnaire instead of square brackets (e.g., “per hour of using the method” or “per procedure performed”), depending on the method or recommendation.* | Open-ended |
| 5.1. To implement [method/evidence-based recommendations] in my practice, I definitely need more **resources (materials, equipment) than I currently have.** | Likert scale |
| 5.2. If you need more materials or equipment, please specify **which ones?** | Open-ended |
| 6.1. To implement [method/evidence-based recommendations] in my practice, I will definitely need more support from management than I currently have **in overcoming the difficulties** associated with [using the method/evidence-based recommendations] | Likert scale |
| 6.2. If you need more help from management in overcoming difficulties related to [use of the method/evidence-based recommendations], please indicate **what actions management can take to help** ? *(i.e. discussion at meetings, personal advice, psychological support, specific administrative decisions, other - specify what)* | Open-ended |
| **7. What else** can help you implement [method/evidence-based recommendations] in practice? | Open-ended |

Appendix 2. Reasons for excluding specific items from the preliminary version of the HP-IQ.

| Category 1. Items that did not correspond to the concept of "needs of medical professionals" in modern conditions | |
| --- | --- |
| DIBQ Domains, constructs (and item numbers) | Reason for exclusion / Example |
| **Social/professional role and identity (**Professional role (1-3)). | In the DIBQ, the item “Delivering [PA intervention] following the guidelines is part of my work” is appropriate for assessing the identity of the professional role. At the same time, the formulation “I definitely need the intervention to be part of my work” does not correspond to the real logic of needs, since it is a task that is already part of the responsibilities of a medical professional. |
| **Intentions. (Intention (1-3))** | For example, the item “I intend to deliver [PA intervention] following the guidelines in the next three months” in the DIBQ is relevant in the context of assessing behavioral readiness. At the same time, the statement “I need to intend to conduct an intervention” is conceptually incorrect, since intention is not the object of the need, but rather its consequence or indicator. |
| **Goals (Priority (1-2))** | The DIBQ appropriately asks a question about the balance of priorities: “How often is working on something else on your agenda a higher priority than delivering [PA intervention] following the guidelines?” In contrast, in the context of needs, a statement that refers to the availability of time or resources, rather than a subjective hierarchy of tasks, is more relevant. Therefore, the item about the need for sufficient time for implementation is retained, while the statement about priority is excluded. |
| **Social influences (Subjective norm (1-2)).** | In particular, an item such as “Most people who are important to me think that I should deliver [PA intervention] following the guidelines” within the DIBQ aims to measure subjective norms. However, the formulation “I definitely need people who are important to me to think that I should implement the intervention according to instructions” does not represent a true need, but rather describes the expectations of the environment. |
| **Beliefs and capabilities (Self-efficacy (2–4)).** | The DIBQ assesses the level of confidence of healthcare professionals in their ability to perform an intervention under conditions that make it difficult to perform: when other professionals do not do it, when there is a lack of time, or when patients show low motivation. This formulation does allow us to assess the degree of readiness for implementation. However, in the HP-IQ, a formulation such as: “To implement [method/evidence-based recommendations] in my practice, I definitely need confidence that I can perform it when other professionals do not do it” or “...when there is a lack of time” or “...when patients are not motivated” cannot be considered relevant, since it does not fit into the concept of “healthcare professionals’ needs”. |
| Category 2. Items reflecting needs that cannot be potentially addressed by the management of the medical institution. | |
| DIBQ Domains, constructs (and item numbers) | Reason for exclusion / Example |
| **Optimism (Optimism (1-3))** | The DIBQ includes the question “In my work (as a PT), in uncertain times, I usually expect the best” Optimism is indeed recognized as an important determinant of implementation. However, the need for optimism is internal, emotional in nature, and therefore not something that can be directly influenced by management. Given this, the statement “To implement [method/evidence-based recommendations] in my practice, I definitely need more faith in a better future even in uncertain times” was not included in the final list. |
| **Patient (Patient Characteristics (1-2))** | In the relevant domain, the DIBQ contains questions such as “Participants of [PA intervention] are motivated.” and “...are positive about [PA intervention]”. The need for increased patient motivation or a positive attitude, although important to the professional, is not something that can be provided or controlled by the management of the medical institution. Therefore, the items “In order to implement [method/evidence recommendations] in my practice, I definitely need increased motivation in my patients” and “...have a more positive attitude towards patients” are not included. |
| **Positive emotions (Positive emotions (1-6)), Negative emotions (Negative emotions (1-6))** | In the original DIBQ questionnaire, the questions in these domains are stated as “When I work with [intervention], I feel optimistic” and “When I work with [intervention], I feel pessimistic”. Such items are suitable for a general assessment of the attitude of health workers towards interventions, but not for determining managerial needs. In the HP-IQ, it makes no sense to ask questions about emotional experiences, because if an employee needs more positive or less negative emotions when implementing a method or recommendation, management is not always able to provide this. In this regard, items related to positive and negative emotions are not included. |
| Category 3. Items that were not universal and could not be applied to the implementation of any evidence-based medical intervention or recommendation. | |
| DIBQ Domains, constructs (and item numbers) | Reason for exclusion / Example |
| **Innovation (Innovation Characteristics (1-2))** | The DIBQ assesses whether an intervention can be adapted to the needs of patients and professionals, which is an important characteristic of the intervention itself. However, including a similar item in the HP-IQ is inappropriate, since not all methods or recommendations can be adapted, even if there is such a need. In addition, the need for flexibility does not always depend on management decisions or institutional conditions, but rather on the properties of the intervention itself, and therefore cannot be considered a universal need for healthcare professionals. |
| **Beliefs about capabilities (Perceived behavioral control (4-7))** | The DIBQ includes determinants such as self-efficacy in implementing the intervention, as well as ease of implementation of its individual components: examination, training program, assessment, discussion with the patient, reporting to the specialist who referred the patient. The stated formulations have a high degree of specificity, which limits the possibility of their generalization to all types of evidence-based methods. Therefore, the identification of the need to facilitate these components of the intervention cannot be applied to any practice and is not included in the adapted tool. |
| **Beliefs about consequences (Attitudes (2-4))** | Items in the original DIBQ, such as “For me, delivering [PA intervention] following the guidelines is (not at all worthwhile – very worthwhile), (not pleasurable at all – very pleasurable), (not interesting at all – very interesting)” allow us to assess general attitudes towards the intervention, but do not identify a specific need that may be subject to managerial influence. Since not every evidence-based medical recommendation is capable of evoking enjoyment, interest, or a sense of value in the implementer, and not every organization has the tools to influence these characteristics, these items were not included. |
| **Beliefs about consequences (Outcome expectancies (1-5))** | The DIBQ contains statements such as “If I deliver [PA intervention] following the guidelines, [PA intervention] will be most effective”, “patients will appreciate this”, “this will strengthen the collaboration with professionals with whom I deliver(...)”, “I will feel satisfied”. It has been determined that it is not possible to formulate universal questions on expected outcomes in a HP-IQ that would be equally relevant to all types of medical interventions. The management of the clinical institution cannot guarantee the effectiveness of any intervention, the response of patients, the strengthening of interdisciplinary collaboration or the emotional satisfaction of the implementer.  The item “To implement [method/evidence-based recommendations] in my practice, I definitely need confidence that it will help participants become more physically active” applies only to physical activity and is therefore narrowly specific and is changed to “To implement [method/evidence-based recommendations] in my practice, I definitely need a greater understanding of what benefits it has for my patients” in the adapted instrument. |
| **Socio-political context (Socio-political context (1-3))** | The DIBQ assesses the importance of factors such as government support, insurance coverage, and the general focus of primary care on prevention. While these aspects are important for the implementation of many interventions, they cannot be considered universal for all clinical practices. Their inclusion in the HP-IQ is inappropriate. |
| **Social influences (Descriptive norm (1-2))** | The DIBQ takes into account social factors, including the perception that other professionals are also implementing the intervention. Although social norms may influence behavior, the need for other staff to follow the same practices is not always relevant. There are clinical situations where different team members are responsible for different components of implementation, and a sense of solidarity is not necessarily decisive. For this reason, the item was not included in the HP-IQ. |
| **Nature of the behaviors (Automaticity (1-4))** | The DIBQ includes an important determinant — automaticity, that is, the extent to which the performance of a certain intervention is habitual, almost unconscious. However, not every medical practice allows for this form of integration. Moreover, many clinical interventions require a conscious, critically considered approach and individual decision-making. Therefore, the need for automaticity cannot be universal, so the item was not included in the HP-IQ. |
| Category 4. Items that duplicate the main idea of other items in the HP-IQ | |
| DIBQ Domains, constructs (and item numbers) | Reason for exclusion / Example |
| **Role Clarity (Role Clarity (1-3))** | Items in this domain address goals, responsibilities, and expectations for the intervention. The main idea resonates with the need for clear instructions, which is already presented in the *Knowledge domain* , already included as a separate item in the HP-IQ. |
| **Skills (Skills (1-2))** | All domain items relate to the skills determinant, which is included in the HP-IQ. |
| **Beliefs about capabilities (Perceived behavioral control (2-3))** | These items reflect the determinant of ease of implementation of the intervention, which is also present in the “Innovation” domain. Therefore, the inclusion of items from both domains that relate to the same determinant was considered redundant. |
| **Organization (Organizational Resources and Support (3-4))** | Items regarding management's ability to listen to implementation problems, management assistance in implementation are already covered in the item on the need for management support included in the HP-IQ (“Organization” domain). |
| **Innovation Strategy (Innovation Strategies (1-7))** | Items related to training and practice, which are included in the concept of the need for practical skills from the “Skills” domain; items related to materials and support are also represented in the “Organization” domain; the need for financial motivation is included in the “Reinforcement” domain. The item on organizing meetings by management corresponds to the need for management support from the “Organization” domain, and the item on providing information about the results of the intervention by the organization resonates with the need for recognition from management from the “Reinforcement” domain. |
| **Behavioral Regulation (Action Planning (1-3)** | Coping Planning (1-3)) Items address having a clear plan, understanding the circumstances and timing of an intervention, and having a plan for dealing with difficult situations. This fits into the notion of needing more detailed instructions from the Knowledge domain. |
| **Nature of Behaviors (Memory (2))** | Both domain items relate to the determinants of memory, so one of the items was excluded and the second was included in the context of the need for a reminder system. |
| Category 5. Items that looked complicated, broad, and ambiguous; | |
| DIBQ Domains, constructs (and item numbers) | Reason for exclusion / Example |
| **Self-efficacy (1))** | In the DIBQ, the item “I am confident that I can implement [PA intervention] according to the guidelines.” allows us to determine the general belief in one’s own competence. At the same time, a question in the HP-IQ that would look like “To implement [method/evidence-based recommendations] in my practice, I definitely need more confidence that I can implement the method or recommendation” is too general. Confidence can depend on a number of factors: knowledge, skills, time, support from colleagues or management. These aspects are already covered by separate items in the new HP-IQ. In addition, the general level of self-confidence can often also affect the confidence in applying the method or recommendation, and is not directly influenced by the organizational environment. Given this, this statement was not included in the final version of the HP-IQ. |
| **Beliefs about capabilities (Perceived behavioral control (1))** | The DIBQ item “I have control over delivering [PA intervention] following the guidelines” is clearly aimed at assessing the belief in the existing level of control over behavior. In contrast, in the new HP-IQ, the wording “To implement [method/evidence-based recommendations] in my practice, I definitely need to feel more in control of the process” is too general and difficult to interpret unambiguously. The feeling of control can be formed under the influence of such factors as the presence of a clear algorithm of actions, developed skills, as well as personal traits. These aspects are either already taken into account in other items of the HP-IQ or cannot always be changed by management actions. For this reason, the item was not included as a separate item in the final version. |
| **Innovation (Innovation characteristics (4))** | The assessment of the need for the intervention to be compatible with everyday practice may be too general, as it covers several aspects already present in the new questionnaire: instructions, resources, support from colleagues and management. Each of these components specifies potential barriers that influence the implementation. In contrast, a generalized question on compatibility may duplicate these determinants without adding new information. Therefore, the inclusion of such an item is not appropriate. |
| **Social influences (Social support (2-3))** | Items related to colleagues' ability to listen to implementation problems, colleagues' assistance in implementation are included in the determinant of colleague support, which is included in the HP-IQ (domain “Social influences”). |
| **Beliefs about consequences (Attitude (1))** | The item regarding beliefs about the personal benefits of implementing the intervention is somewhat generalized, and its content partially overlaps with other items—in particular, those regarding recognition, support, and financial motivation, which indirectly influence the subjective perception of benefits for the employee. |

Appendix 3. Results of Round 1 of Content Validity Assessment

| Questionnaire items  (Closed questions are rated on a 5-point Likert scale (1 - "strongly disagree", 2 - "disagree", 3 - "uncertaint", 4 - "agree", 5 - "strongly agree").  Answers to open-ended questions are provided in the form of extended text)  In the questionnaire items, the words ‘[method/evidence-based recommendation]’ are replaced with the name of the specific method or recommendation, focusing on the needs of healthcare professionals in its implementation. | CVR | I-CVI (relevance) | I-CVI (clarity) | Comments | Authors' decision on the point |
| --- | --- | --- | --- | --- | --- |
| To implement [method/evidence-based recommendations] in my practice, I definitely need clearer instructions than I currently have. | 0.83 | 0.92 | 1 | “Do you mean instructions regarding implementation or regarding the use of the method?”  “Overall, it is quite clear and is decisive, as clear instructions are extremely necessary and simplify the task for any employee, and even more simplify the work of the manager”  “No comments” | Changed  To implement [method/evidence-based recommendations] in my practice, I definitely need clearer **instructions than I currently have** on [using the method/evidence-based recommendations]. |
| If you need clearer instructions, please specify which ones? | 0.83 | 0.92 | 1 | It might be worth making the question more detailed and asking something like: "What exactly do you think needs more explanation?" or "What part of the instructions do you think needs clarification?"  “Clear instructions” in the form of SOPs (Standard Operating Procedures)?”  "Maybe give options for topics in brackets (change of schedule, financing...)" | Changed  If you need clearer instructions, please indicate **what exactly in the instructions needs clarification or more detailed explanation?** |
| If you need clearer instructions, please indicate how you would like them provided? | 0.33 | 0.92 | 0.92 | “I believe that this item from the questionnaire is not decisive, since the information "clear instructions/SOPs/Regulations" should be distributed according to the principles of internal communication, e.g., in writing, by email, or printed versions.”  “I think it would be interesting to create answer options here - training - video lesson - consultation, so that people can more easily specify, because people get hung up on open questions, especially if there are a lot of them.”  “Provide instructions, do you mean email, text in one of the messengers or in Print View?” | Removed |
| To implement [method/evidence-based recommendations] in my practice, I definitely need more practical skills. | 0.83 | 0.92 | 1 | “What exactly do you mean: practical skills for implementation or practical skills being implemented?” | Changed  To implement [method/evidence-based recommendations] in my practice, I definitely need more  **practical skills** to [use the method/evidence-based recommendations] than I currently have. |
| If you need more practical skills, please specify which ones? | 1 | 1 | 1 | “What exactly do you mean: practical skills for implementation or practical skills being implemented?” | Changed  If you need more practical skills for [using the method/evidence-based recommendations], please specify **which ones?** |
| If you need more practical skills, please indicate what you need to develop them? | 0.67 | 0.92 | 0.92 | “People may not know(...). Someone only knows "lectures" but are they more effective than, for example, trainings?”  “…Detail "e.g., on-the-job training, online course at the National Health Service"”  “‘What do you need’ do we want to know in general or what is needed from the medical institution’s management team?” | Changed  If you need more practical skills for [using the method/evidence-based recommendations], please specify **what you need to develop them?** *(i.e. training with practical work, supervision meetings with experts, mentoring, video, online course, other - specify what)* |
| To implement [method/evidence-based recommendations] in my practice, I definitely need a greater understanding of what benefits it has for my patients. | 0.33 | 0.92 | 0.92 | “Unnecessary item”.  “Maybe to the beginning?” | Removed |
| If you have doubts about the usefulness of [method/evidence-based recommendations], please describe them. | 0.5 | 0.83 | 0.91 | “...When going through the questionnaire, it seemed to stand out from the context. We talked about needs, and here doubts crept in...” | Removed |
| To implement [method/evidence-based recommendations] in my practice, I definitely need the performing process to be simpler than it is now. | -0.33 | 0.92 | 0.83 | “What if the method cannot be simpler a priori? That is, can all interventions be simplified? Won’t such a question put colleagues in a dead end?”  “Simpler in what sense - technical, practical????” | Removed |
| If you need to simplify the performing process, please specify what is needed for this? | 0.33 | 0.92 | 0.92 | “If a medical worker knows how to solve a problem on their own, the only question is why the manager who can help still doesn’t know about it.”  “Managers should be offered options” | Removed |
| To implement [method/evidence-based recommendations] into my practice, I definitely need more time than I have now to perform it. | 0.67 | 0.83 | 0.92 | Depends on the context of the method or recommendation | Saved |
| If you need more time to perform [method/evidence recommendations], please indicate how much? | 0.5 | 0.83 | 0.92 | Do we only need to know how much time is available or might we also be interested in whether there is anything we can do to help find additional time? (e.g. an additional assistant, nurse, etc.) | Removed |
| If you need more time to perform [method/evidence-based recommendations], please specify what is required for this? | 0 | 0.92 | 0.67 | “I didn’t understand the question. What is needed to increase time? Increase time.  Rephrase this item"  “I can answer here: time management skills. Will this answer help the management team to change anything?”  “The question is, if you need time, then what do you need? The question already has the answer: time. It’s a little unclear.” | Changed  If you need more time, please indicate **what could help free up time** for [use of method/evidence-based recommendations]? *(i.e. increasing the duration of the consultation, additional paid hours, time management training, hiring an assistant, other - specify what).* |
| To implement [method/evidence-based recommendations] into my practice, I definitely need additional financial compensation. | 0.83 | 1 | 1 | “It is possible to replace the word "compensation" with the word "motivation" or "stimulation" because compensation is for the time spent, it would be better if the person himself gave his own” | Changed  To implement [method/evidence-based recommendations] in my practice, I definitely need additional **financial motivation**. |
| If you require additional financial compensation, please indicate the amount. | 0.33 | 0.92 | 0.92 | “If a person needs an additional bonus, what do you mean by that? For the completed unit of working hours (if they are spent on implementation). There will be a very different sample, it may even be valuable”  “Here you can offer, for example, a one-time, quarterly, monthly bonus, or a % of the salary, depending on the implementation of the method/evidence-based recommendation”  “There is a risk of not covering the request for the specified amount of financial compensation”  “It seems to me that asking about specific amounts in the questionnaire is not entirely appropriate. That’s my opinion.” | Changed  If you need additional financial motivation**, what amount** would you consider sufficient [for amount of work completed]* *[for the amount of work completed] is established by the person conducting the survey of healthcare professionals and is indicated in the questionnaire instead of square brackets (e.g., “per hour of using the method” or “per procedure performed”), depending on the method or recommendation.* |
| If you require other compensation, please describe it. | 0.33 | 0.75 | 0.83 | “It’s quite democratic, yet healthcare workers may not understand what other compensation they need or have unrealistic expectations”  “It can be difficult for doctors to understand, given the cultural and social aspects. It is likely that doctors do not know that you can ask for extra days off for revisions, subscription to training/medical societies, etc., that is, what is available in the world. How can you direct their opinion and is it necessary?” | Removed |
| To implement [method/evidence-based recommendations] in my practice, I definitely need more resources (materials, equipment) than I currently have. | 0.83 | 1 | 0.92 | No comments | Saved |
| If you need more materials or equipment, please specify which ones? | 1 | 1 | 1 | “Great question”  “Depends on the context of the method” | Saved |
| To implement [method/evidence-based recommendations] in my practice, I definitely need more support from the medical institution’s management team than I currently have. | 0.33 | 0.92 | 1 | “If the questionnaire is anonymous, then the question is appropriate, as otherwise it may create problems for employees”  “What is meant by support?” | Changed  To implement [method/evidence-based recommendations] in my practice, I definitely need **more help** **from the medical institution’s management team** than I currently have in overcoming the difficulties associated with [using the method/evidence-based recommendations] |
| If you need more support from the medical institution’s management team, please specify in what situations? | 0.67 | 0.91 | 1 | Add "when implementing the method"  “Depending on the context of the method or evidence-based recommendation, it may also suggest predictable options”  “There are 2 important questions here: in what cases and what kind of help?” | Changed  If you need more help from the medical institution’s management team in overcoming difficulties related to [using the method/evidence recommendations], describe **your difficulties.** |
| If you need more support from the medical institution’s management team, please specify what kind? | 0.17 | 0.91 | 0.92 | “It is important to add options/distractors of support from management team at this point so that employees can choose”  “The question is clear, it can be combined with the previous one…”  “Similar to the previous question” | Changed  If you need more help from the medical institution’s management team in overcoming difficulties related to [use of the method/evidence-based recommendations], please indicate **what actions** the medical institution’s management team **can take to help**? *(i.e. discussion at meetings, personal advice, psychological support, specific administrative decisions, other - specify what)* |
| To implement [method/evidence-based recommendations] into my practice, I definitely need more support from colleagues. | 0.33 | 0.92 | 0.91 | “What if they haven’t used the help of their colleagues yet?”  “In my opinion, the point is decisive if the implementation object requires team involvement. On the other hand, the point reveals a personal need for support from colleagues in any circumstances, which is difficult to detect by other methods” | Removed |
| If you need more support from colleagues, please specify in what situations? | 0.33 | 0.92 | 1 | “It depends on the context of implementation whether the method is implemented in a team of doctors or together with nurses” | Removed |
| If you need more support from colleagues, please specify what kind? | 0.33 | 0.83 | 0.92 | “Depends on the context”  “Support options can also be offered here” | Removed |
| To implement [method/evidence-based recommendations] in my practice, I definitely need a better reminder system to follow [method/evidence-based recommendations]. | 0.33 | 0.92 | 0.92 | “Depending on the context and complexity of the new method or evidence-based recommendation (this refers to additional reminders when working in the medical information system, do I understand correctly?)  “What if there was no reminder system at all?” | Removed |
| If you need to improve the reminder system, please indicate in what format you would like to receive them? | 0.5 | 0.92 | 0.92 | “See comments on the previous item” | Removed |
| To implement [method/evidence-based recommendations] in my practice, I definitely need more recognition from the medical institution’s management team than I currently have. | 0 | 0.75 | 0.83 | Will everyone correctly understand the term "recognition" in this context?  “This is support - duplicates one of the previous points”  “What kind of recognition do you mean?” | Removed |
| If you need more recognition from the medical institution’s management team, please indicate in what format you would like to receive it? | 0.16 | 0.83 | 0.83 | "Implied?"  “Constructive feedback, praise, recognition in the team, one-time bonus?” | Removed |
| To implement [method/evidence-based recommendations] in my practice, I definitely need more recognition from patients than I currently have. | -0.83 | 0.67 | 0.58 | “Definition depends on context”  “It is not entirely clear what patient recognition is”  “The patient is not obligated to meet our expectations (we should not expect such a delay from patients)”  “So, can the manager somehow increase the recognition from patients so that the doctor wants to do the method?” | Removed |
| If you need more recognition from patients, please indicate in what format you would like to receive it? | -0.67 | 0.67 | 0.75 | “I don’t really understand what this is about…”  "Applause?))"  “See previous comment.” | Removed |
| What else can help you implement [method/evidence-based recommendations] in practice? | 0.83 | 1 | 1 | “In principle, I believe that this question is crucial, because you may not even expect it and a person will offer an option that can and should be considered at the implementation stage.”  A good open question that can cover everything that wasn't mentioned above. | Saved |
